# Supplementary material
Source: Springer Nature journal article supplement (https://www.springermedizin.de/resource/supplementary/13000_2007_87_MOESM2_ESM.pdf/9623822)

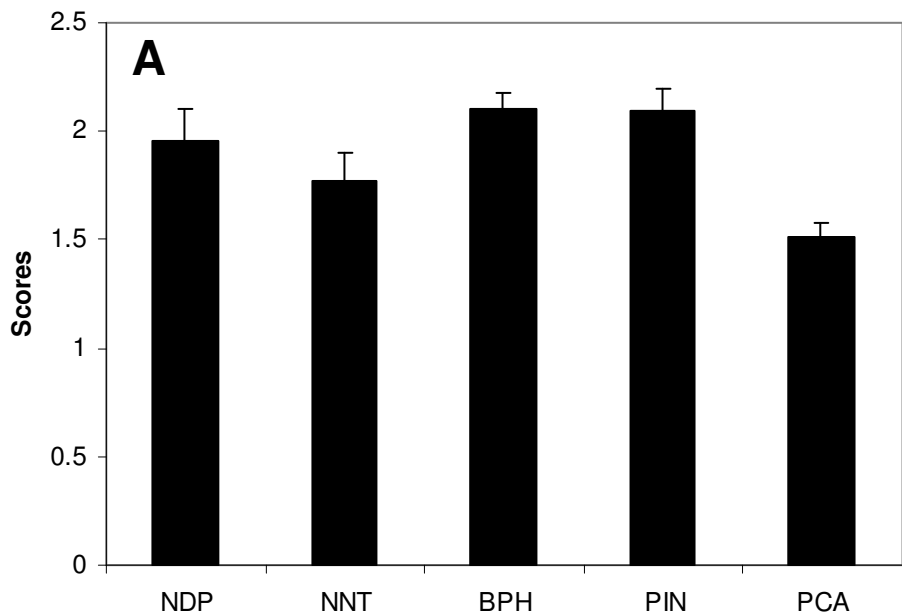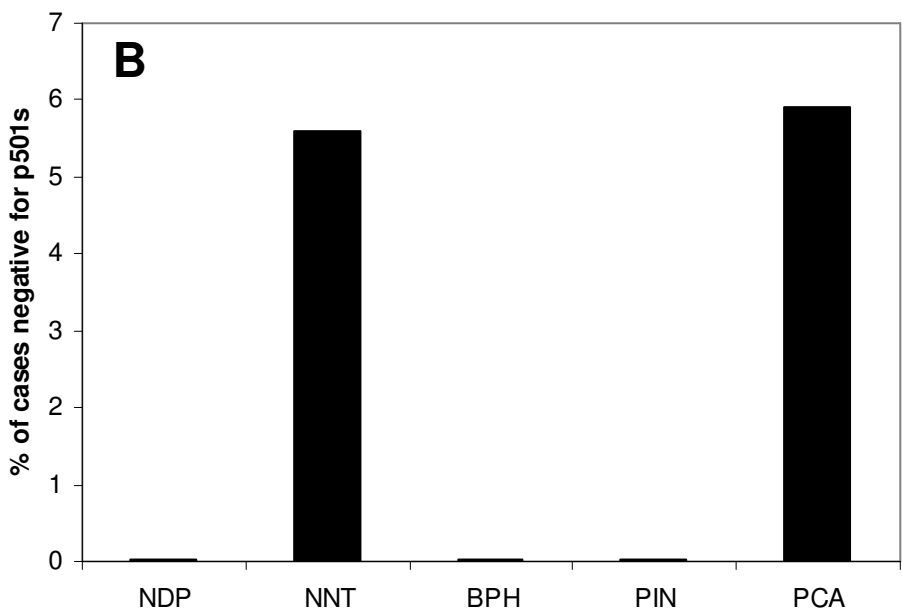

Supplement: MOESM2 [file 9623822]
